# Supplementary material for: Effect of Wide-Spectrum Monochromatic Lights on Growth, Phytochemistry, Nutraceuticals, and Antioxidant Potential of In Vitro Callus Cultures of Moringa oleifera
Source: MDPI journal article supplement (doi:10.3390/molecules28031497), 2023-02-03
Supplement: s1 [file s1]

**Supplementary Table S1:** PGRs concentrations, callus initiation (day), fresh weight (g/L), Dry weight (g/L), morphology of calli, formed from leaf explants under Photoperiod light (16-h light and 8-h dark).

| S. no.    | PGRs treatments (mg/L) | Callus initiation (day)    | Callus color | Callus texture | Fresh Weight g/L | Dry weight g/L |
|-----------|------------------------|----------------------------|--------------|----------------|------------------|----------------|
| 1         | NAA 0.1                | 17 <sup>th</sup> day       | Y            | C              | 38.07            | 4.92           |
| 2         | NAA 1.0                | 15 <sup>th</sup> day       | YG           | C              | 43.23            | 5.76           |
| 3         | NAA 2.5                | 14 <sup>th</sup> day       | YB           | C              | 59.55            | 6.68           |
| 4         | NAA 5.0                | 14 <sup>th</sup> day       | YB           | C              | 83.37            | 8.25           |
| 5         | NAA 10                 | 14 <sup>th</sup> day       | YB           | F              | 73.91            | 7.54           |
| 6         | TDZ 0.1                | 15 <sup>th</sup> day       | YB           | F              | 47.56            | 6.26           |
| 7         | TDZ 1.0                | 14 <sup>th</sup> day       | YB           | C              | 53.01            | 6.45           |
| 8         | TDZ 2.5                | 14 <sup>th</sup> day       | YB           | C              | 88.43            | 8.78           |
| 9         | TDZ 5.0                | 14 <sup>th</sup> day       | B            | C              | 74.82            | 7.61           |
| 10        | TDZ 10                 | 14 <sup>th</sup> day       | YB           | C              | 64.64            | 7.32           |
| 11        | NAA 1+TDZ 0.1          | 14 <sup>th</sup> day       | Y            | C              | 45.98            | 5.83           |
| 12        | NAA 1+TDZ 1.0          | 14 <sup>th</sup> day       | YB           | C              | 89.54            | 8.82           |
| <b>13</b> | <b>NAA 1+ TDZ 2.5</b>  | <b>14<sup>th</sup> day</b> | <b>YB</b>    | <b>F</b>       | <b>114.98</b>    | <b>12.78</b>   |
| 14        | NAA 1+ TDZ 5.0         | 14 <sup>th</sup> day       | B            | F              | 82.01            | 8.13           |
| 15        | NAA 1+ TDZ 10          | 14 <sup>th</sup> day       | B            | F              | 76.0             | 7.64           |
| 16        | BAP 0.1                | 15 <sup>th</sup> day       | B            | F              | 32.35            | 4.52           |
| 17        | BAP 1.0                | 14 <sup>th</sup> day       | B            | F              | 39.22            | 4.76           |
| 18        | BAP 2.5                | 16 <sup>th</sup> day       | B            | F              | 46.45            | 5.89           |
| 19        | BAP 5.0                | 14 <sup>th</sup> day       | G            | C              | 52.07            | 6.37           |
| 20        | BAP 10                 | 14 <sup>th</sup> day       | YB           | C              | 48.98            | 6.18           |
| 21        | NAA 1 + BAP 0.1        | 14 <sup>th</sup> day       | YB           | C              | 44.76            | 5.81           |
| 22        | NAA 1+ BAP 1.0         | 15 <sup>th</sup> day       | YB           | C              | 57.64            | 6.78           |
| 23        | NAA 1+ BAP 2.5         | 13 <sup>th</sup> day       | GB           | C              | 83.67            | 8.46           |
| 24        | NAA 1 + BAP 5.0        | 14 <sup>th</sup> day       | GB           | C              | 62.83            | 7.18           |
| 25        | NAA 1+ BAP 10.0        | 13 <sup>th</sup> day       | B            | F              | 75.61            | 7.69           |

C = Compact; F = Friable; YG = Yellowish Green; YB= Yellowish Brown; GB= greenish brown ; Y = Yellow; B= Brown
